# Supplementary material
Source: PubMed Central journal article supplement (PMC2659191)

**Supplemental Fig. 1.** Myosin V or myosin II is not involved in D<sub>4</sub> reduction of GABA<sub>A</sub>R currents. **A**, Plot of normalized peak GABA<sub>A</sub>R current as a function of time and PD168077 (30 μM) application in neurons dialyzed with or without the myosin V antibody (2 μg/ml). **B**, Cumulative data (mean ± SEM) showing the percent reduction of GABA<sub>A</sub>R current by PD168077 in a sample of neurons dialyzed with or without myosin V antibody. **C, D**, Cumulative plots of the distribution of mIPSC amplitudes before (control) and after PD168077 (30 μM) application in cultured PFC neurons dialyzed without (C) or with (D) the myosin II inhibitor blebbistatin (2.5 μM). **E**, Cumulative data (mean ± SEM) showing the percent reduction of mIPSC amplitudes by PD168077 in the absence and presence of blebbistatin.

Supplemental Figure 1

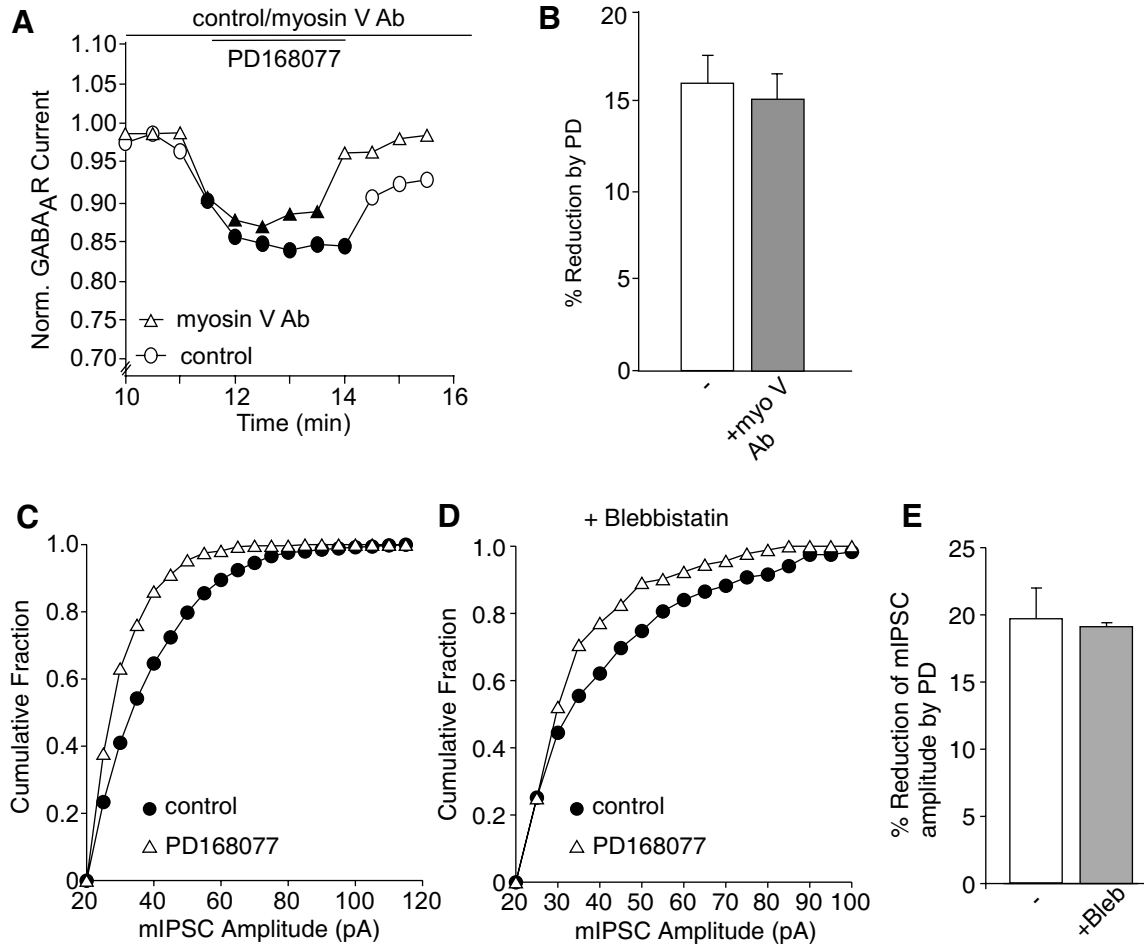

Supplement: M807387200_1.pdf [file M807387200_1.pdf]
